# Supplementary material
Source: publisher site journal article supplement (https://static.cambridge.org/content/id/urn:cambridge.org:id:article:S1751731120001081/resource/name/S1751731120001081supp001.docx)
Supplement: Supplementary file 1 [file S1751731120001081supp001.docx]

*animal* journal

# Supplementary material

**A longitudinal study of pre- and post-weaning tail damage in non-docked pigs**

F. Hakanssona,*, H. P. Lahrmannb and B. Forkmana

*aDepartment of Veterinary and Animal Sciences, University of Copenhagen, Groenegaards-vej 8, 1870, Frederiksberg, Copenhagen, Denmark*

*bSEGES, Danish Pig Research Centre, Agro Food Park 15, 8200 Aarhus N*

Corresponding author: Franziska Hakansson. E-mail: fh@sund.ku.dk

**Supplementary Table S1:** *Picture examples for the classification scheme for tail damage in piglets prior to weaning (see Table 1 in manuscript).*

| 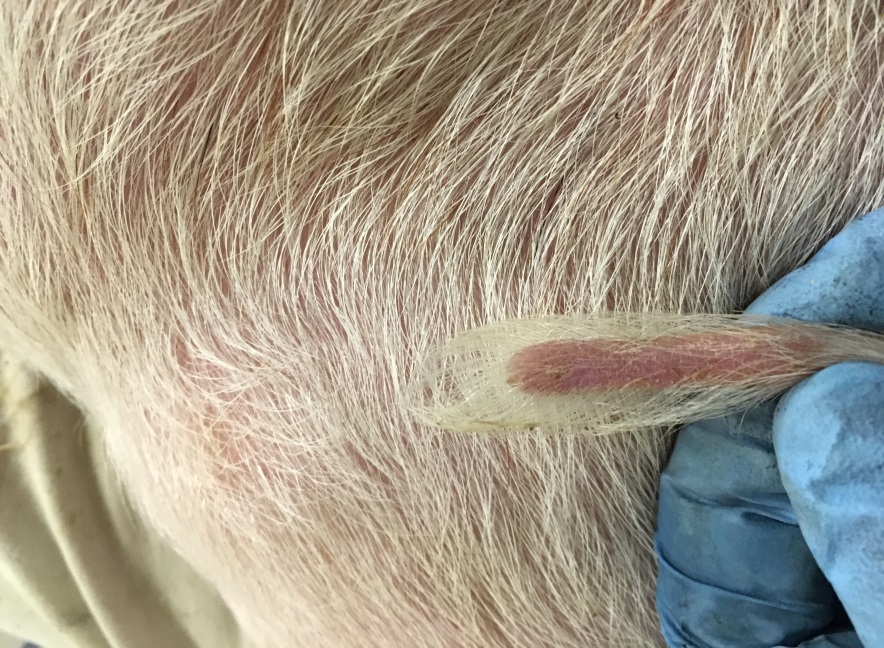 | **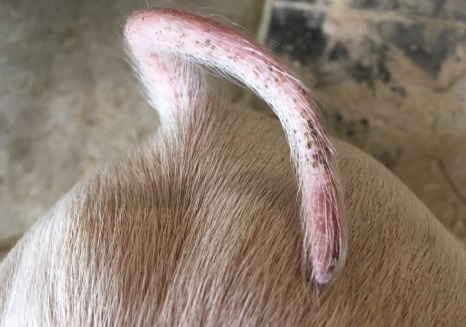** | 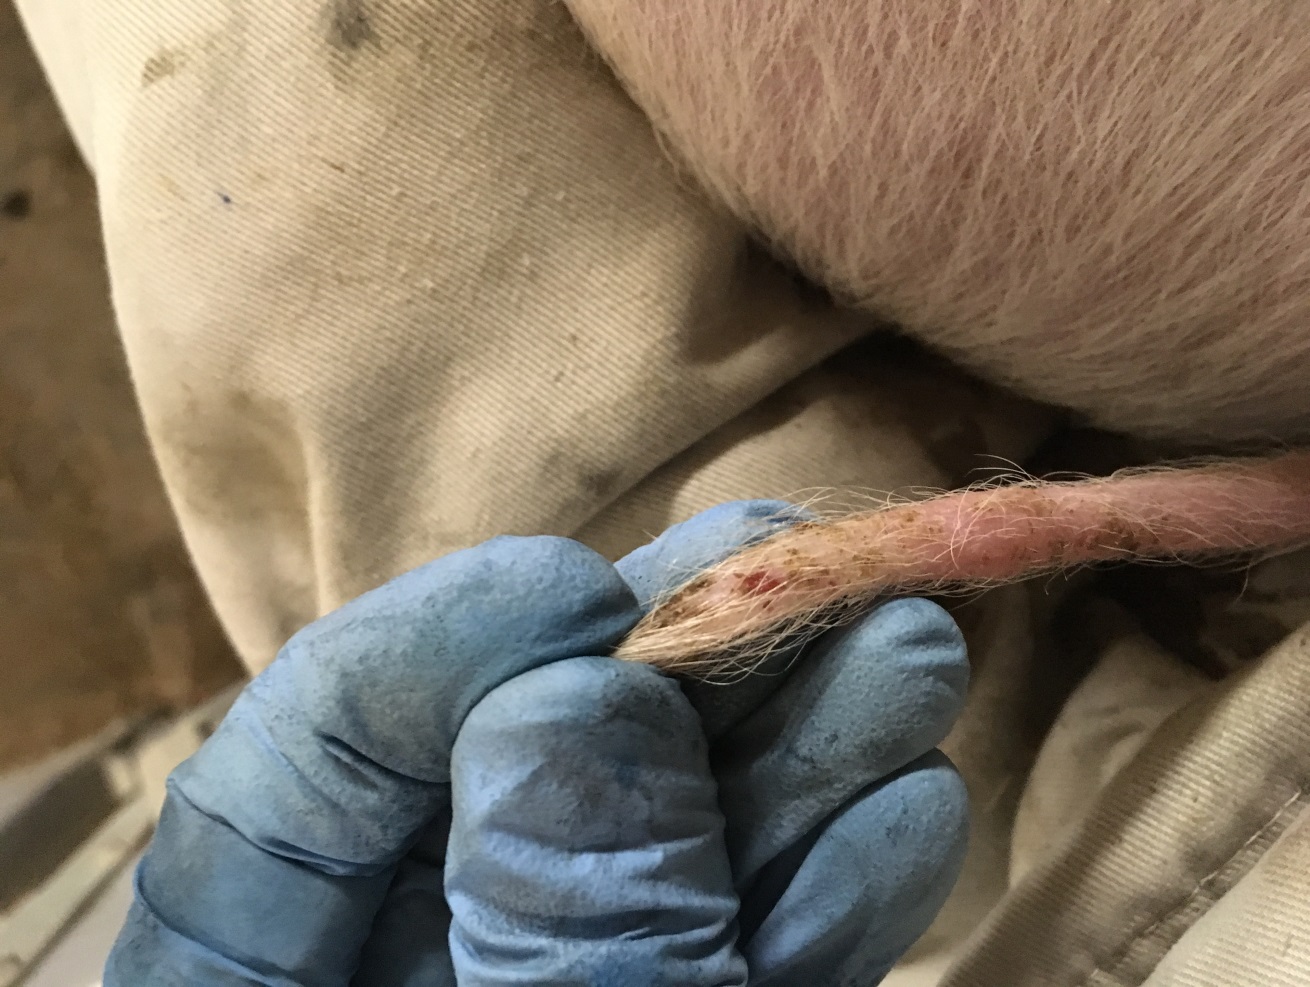 |
| --- | --- | --- |
| Tail-wound score: 0  Tail-length score: 0 | Tail-wound score: 1  Tail-length score: 0 | Tail-wound score: 2  Tail-length score: 0 |
| 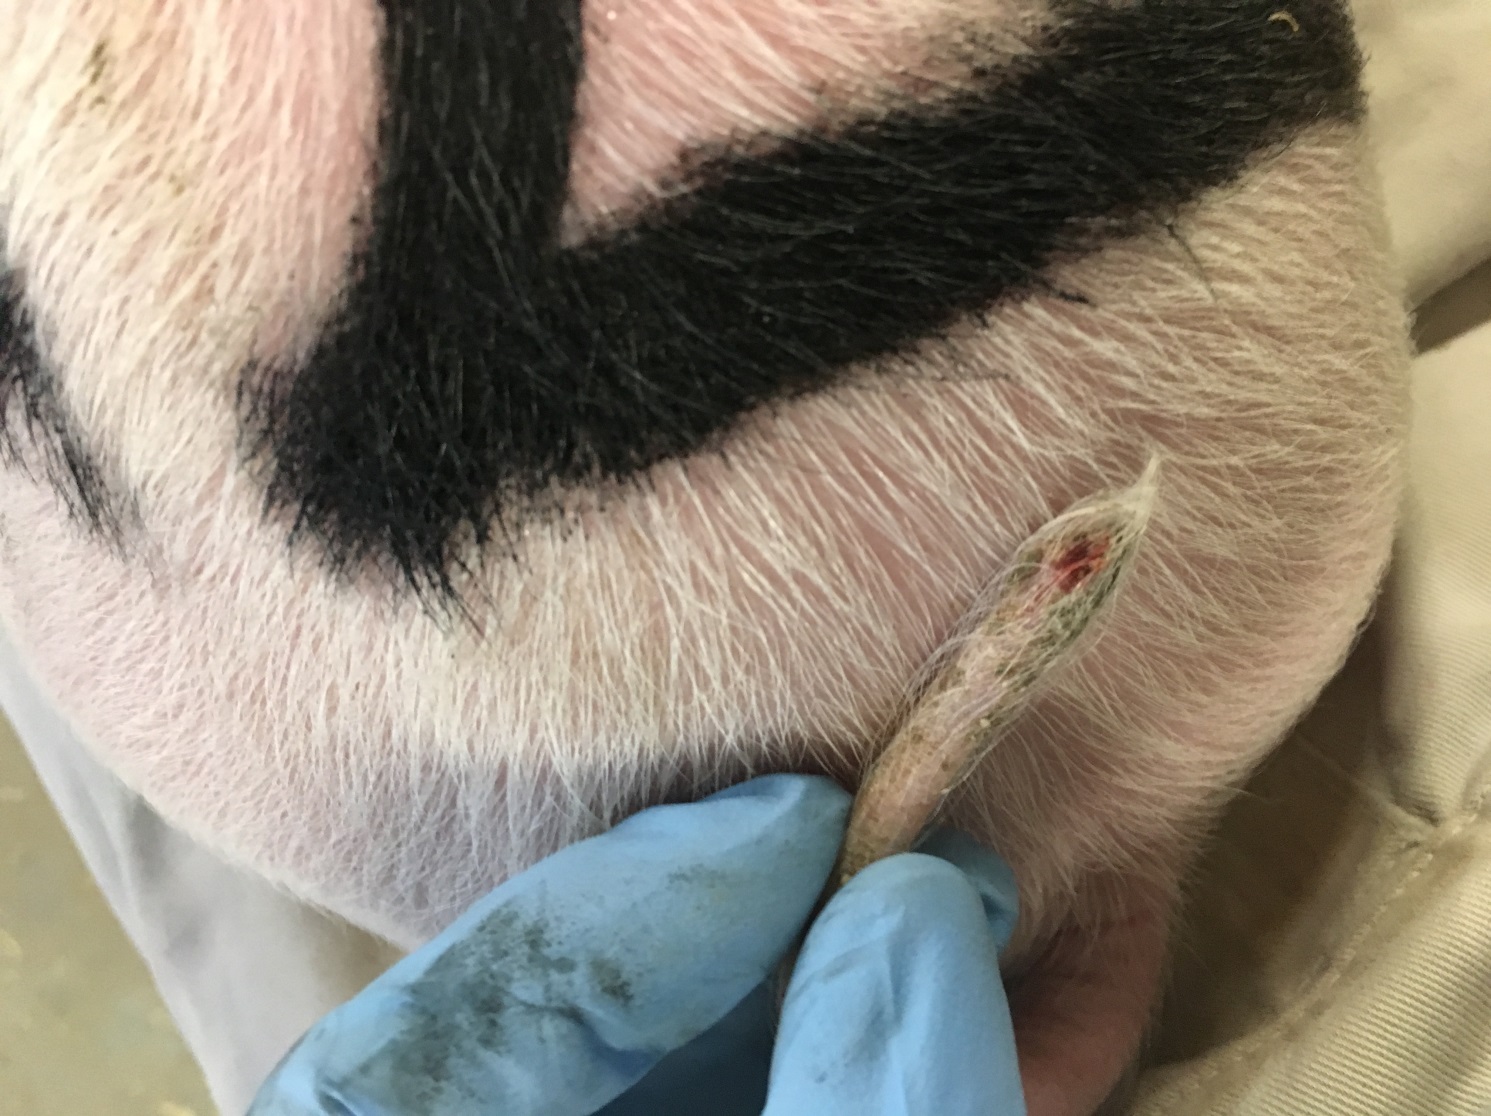 | 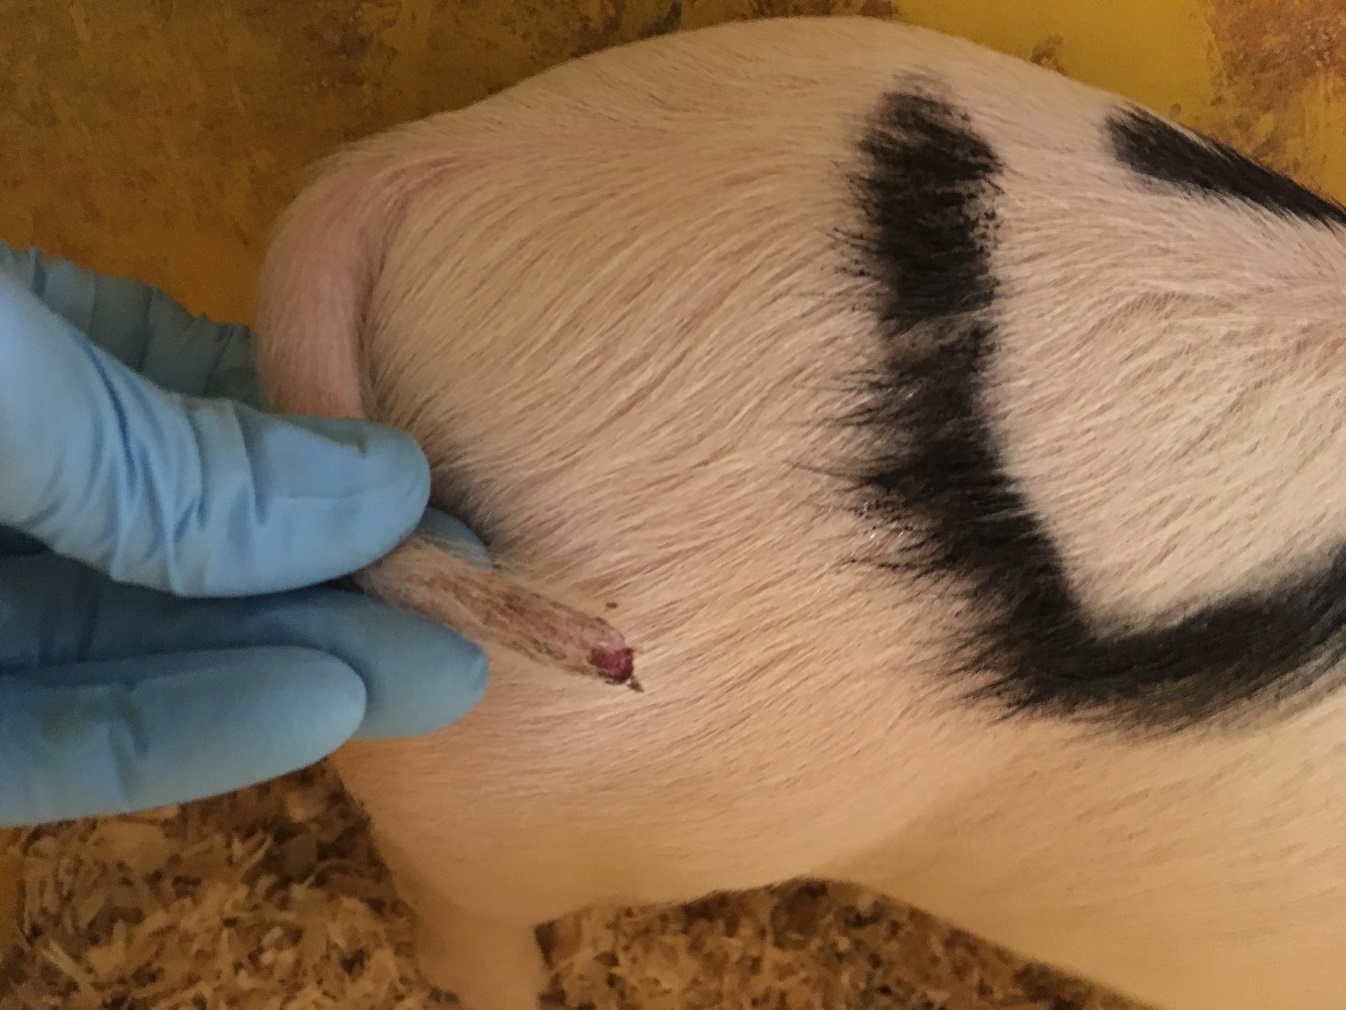 | 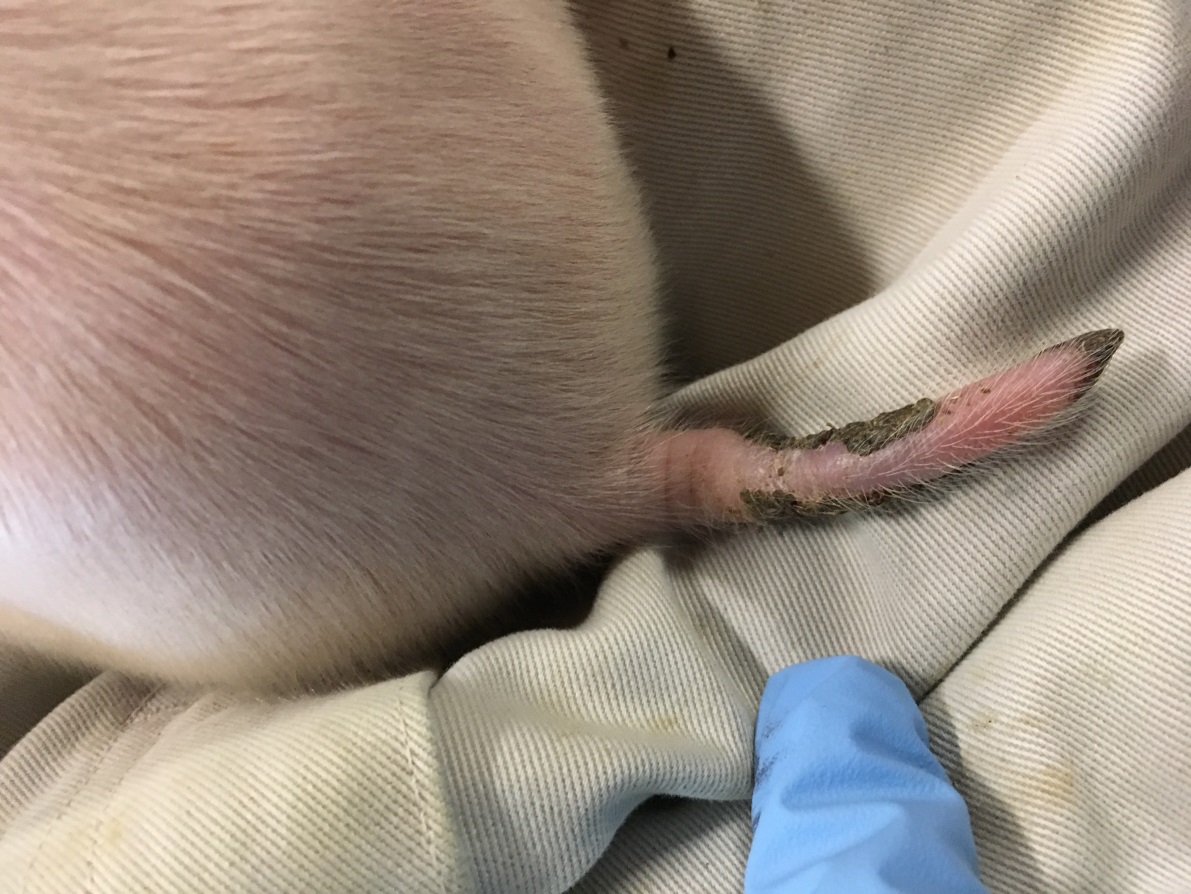 |
| Tail-wound score: 3  Tail-length score: 0 | Tail-wound score: 3  Tail-length score: 1 | Tail-wound score: 2  Tail-length score: 2 |


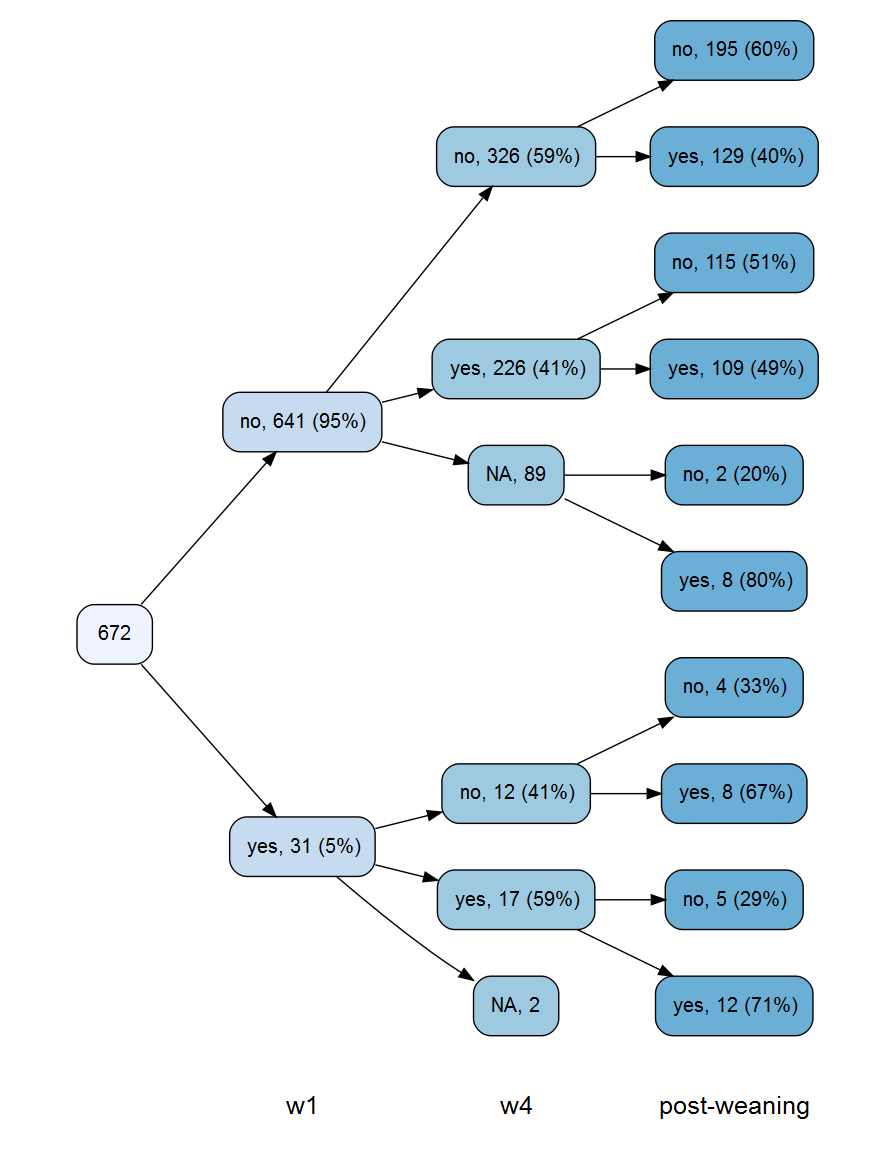


**Supplementary Figure S1:** Number and percentage of pigs identified with/without tail damage pre- and post-weaning (w= week of age, NA= missing/dead at assessment). Tail damage was summarized as the number of individuals with any tail lesion.
